# Supplementary material for: Spinal Cord Stimulation vs Medical Management for Chronic Back and Leg Pain: A Systematic Review and Network Meta-Analysis
Source: PubMed Central journal article supplement — JAMA Netw Open. 2024 Nov 14;7(11):e2444608. doi: 10.1001/jamanetworkopen.2024.44608 (PMC11565267; doi:10.1001/jamanetworkopen.2024.44608), 2024-11-14

## Supplemental Online Content

Huygen FPM, Soulanis K, Rtveladze K, Kamra S, Schlueter M. Spinal cord stimulation vs medical management for chronic back and leg pain: a systematic review and network meta-analysis. *JAMA Netw Open*. 2024;7(11):e2444608. doi:10.1001/jamanetworkopen.2024.44608

**eTable 1.** Population, Intervention, Comparator, Outcomes, Study Design (PICOS) Search Strategy

**eTable 2.** Embase Search Strategy (1974 to September 2, 2022)

**eTable 3.** MEDLINE Search Strategy (1946 to September 2, 2022)

**eTable 4.** Cochrane Search Strategy (2005 to August 31, 2022)

**eTable 5.** Summary of Available Patient Characteristics Across Included Studies

**eTable 6.** Study Results for Evidence Synthesis of the Included Studies

**eTable 7.** Prior Distributions Used in the Bayesian NMAs for All Outcomes

**eTable 9.** Matrix of Bayesian NMA Results for All Follow-Up Assessment Timepoints

**eFigure 1.** Overall Risk of Bias Across the Identified Studies

**eFigure 2.** Forest Plot for Proportion of Patients Achieving at Least 50% Pain Reduction in Back, FE Model (Assessment Timepoint: 6 Months)

**eFigure 3.** Forest Plot for Proportion of Patients Achieving at Least 50% Pain Reduction in Lower Limbs/Leg, RE Model (Assessment Timepoint: 6 Months)

**eFigure 4.** Forest Plot for Pain Intensity Score in Back, FE Model (Assessment Timepoint: 6 Months)

**eFigure 5.** Forest Plot for Pain Intensity Score in Lower Limbs/Leg, RE Model (Assessment Timepoint: 6 Months)

**eFigure 6.** Forest Plot for EQ-5D Index Score, FE Model (Assessment Timepoint: 6 Months)

**eFigure 7.** Forest Plot for Functional Disability: ODI Score, FE Model (Assessment Timepoint: 6 Months)

This supplemental material has been provided by the authors to give readers additional information about their work.

**eTable 1.** Population, Intervention, Comparator, Outcomes, Study design (PICOS) search strategy

| PICOS           | Inclusion                                                                                                                                                                                                                                                                                                                                                                                                                                                       | Exclusion                                                                                                                                                                                                                                                                    |
|-----------------|-----------------------------------------------------------------------------------------------------------------------------------------------------------------------------------------------------------------------------------------------------------------------------------------------------------------------------------------------------------------------------------------------------------------------------------------------------------------|------------------------------------------------------------------------------------------------------------------------------------------------------------------------------------------------------------------------------------------------------------------------------|
| Population      | SCS-naïve adults (≥18 years old) with chronic back/leg pain (FBSS or PSPS, NSRBP, CRPS) and diabetic peripheral neuropathy*                                                                                                                                                                                                                                                                                                                                     | <ul style="list-style-type: none"> <li>• Paediatrics &lt;18 years old</li> <li>• Patients with cancer-related pain, ischaemic pain (PVD, angina)</li> <li>• Patients without chronic back/leg pain (FBSS or PSPS, NSRBP, CRPS) and diabetic peripheral neuropathy</li> </ul> |
| Intervention    | <ul style="list-style-type: none"> <li>• SCS alone or in combination</li> <li>• DRGS alone or in combination</li> </ul>                                                                                                                                                                                                                                                                                                                                         | Interventions not listed in the inclusion criteria                                                                                                                                                                                                                           |
| Comparator      | No restrictions**                                                                                                                                                                                                                                                                                                                                                                                                                                               | Not applicable                                                                                                                                                                                                                                                               |
| Outcomes        | No restrictions but can include the following: <ul style="list-style-type: none"> <li>• ≥50% reduction in pain</li> <li>• ≥30% reduction in pain</li> <li>• Pain relief (NRS, VAS)</li> <li>• QoL</li> <li>• Functional capacity</li> <li>• Functional disability (ODI)</li> <li>• Analgesic medication use</li> <li>• Treatment satisfaction</li> <li>• Safety (AEs and mortality)</li> <li>• Sleep quality (PSQ-D)</li> <li>• Fall under morbidity</li> </ul> | None                                                                                                                                                                                                                                                                         |
| Study design(s) | <ul style="list-style-type: none"> <li>• RCTs</li> <li>• Long-term safety/observational studies that <u>originated</u> from RCTs</li> <li>• SLRs***</li> </ul>                                                                                                                                                                                                                                                                                                  | Study designs not listed in inclusion criteria                                                                                                                                                                                                                               |
| Limits          | <ul style="list-style-type: none"> <li>• Language: English and German</li> <li>• Year limit: No restriction</li> <li>• Study duration: No restriction</li> <li>• Limitations by study sample size: No restriction</li> </ul>                                                                                                                                                                                                                                    | Other languages                                                                                                                                                                                                                                                              |

Abbreviations: AE, Adverse event; CRPS, Complex Regional Pain Syndrome; DRGS, Dorsal Root Ganglion Stimulation; FBSS, Failed Back Surgery Syndrome; NRS, Numeric rating scale; ODI, Oswestry Disability Index; PSPS, Persistent Spinal Pain Syndrome; PSQ, Pain and sleep questionnaire; PVD, Peripheral vascular disease; QoL, Quality of life; RCT, Randomized control trial; SCS, Spinal cord stimulation; SLR, Systematic literature review; VAS, Visual analogue scale.

\*Subject to clinical rationale, should group studies by underlying conditions prior to evidence synthesis.

\*\*Active comparators strongly preferred.

\*\*\* Systematic literature reviews will be included at abstract review stage in order to search their reference lists for any missed studies and subsequently excluded during full text review stage

**eTable 2.** Embase search strategy (1974 to 2022 September 02)

| #  | Searches                                                                                                                                                                                                                                                                                            | Results |
|----|-----------------------------------------------------------------------------------------------------------------------------------------------------------------------------------------------------------------------------------------------------------------------------------------------------|---------|
| 1  | exp backache/ or exp leg pain/                                                                                                                                                                                                                                                                      | 176551  |
| 2  | exp diabetic neuropathy/                                                                                                                                                                                                                                                                            | 27191   |
| 3  | exp peripheral neuropathy/                                                                                                                                                                                                                                                                          | 79927   |
| 4  | ((back or musculoskel* or intractabl* or leg or neuropath* or phantom limb or fantom limb or complex or regional or spinal cord) adj4 pain) or CRPS).mp.                                                                                                                                            | 217074  |
| 5  | (sciatica or back-ache or back*ache or lumbago or FBSS or PSPS or (diabet* adj3 neuropath*) or (peripheral adj3 neuropath*) or (reflex adj4 dystroph*) or (sudeck* adj2 atroph*) or causalg* or (failed back adj4 surg*) or (failed back adj4 syndrome*) or (persistent spinal adj4 syndrome*)).mp. | 171374  |
| 6  | or/1-5                                                                                                                                                                                                                                                                                              | 373614  |
| 7  | exp spinal cord stimulation/                                                                                                                                                                                                                                                                        | 8598    |
| 8  | ((spinal cord adj3 (stimulat* or electrostimulat*)) or (dorsal root adj3 (stimulat* or electrostimulat*)) or SCS or Dorsal root ganglion stimulation or DRGS).mp.                                                                                                                                   | 30049   |
| 9  | ((epidural adj3 (stimulat* or electrostimulat*)) or SENZA or neuromodul*).mp.                                                                                                                                                                                                                       | 69413   |
| 10 | or/7-9                                                                                                                                                                                                                                                                                              | 95416   |
| 11 | 6 and 10                                                                                                                                                                                                                                                                                            | 9768    |
| 12 | exp randomized controlled trial/                                                                                                                                                                                                                                                                    | 728326  |
| 13 | Clinical Trial/                                                                                                                                                                                                                                                                                     | 1045890 |
| 14 | controlled clinical trial/                                                                                                                                                                                                                                                                          | 468225  |
| 15 | multicenter study/                                                                                                                                                                                                                                                                                  | 335670  |

| #  | Searches                                                                             | Results |
|----|--------------------------------------------------------------------------------------|---------|
| 16 | Phase 2 clinical trial/                                                              | 99073   |
| 17 | Phase 3 clinical trial/                                                              | 62516   |
| 18 | Phase 4 clinical trial/                                                              | 4912    |
| 19 | exp randomization/                                                                   | 95285   |
| 20 | Single Blind Procedure/                                                              | 47426   |
| 21 | Double Blind Procedure/                                                              | 198771  |
| 22 | Crossover Procedure/                                                                 | 71364   |
| 23 | Placebo/                                                                             | 385558  |
| 24 | (randomi?ed controlled trial\$ or rct).tw.                                           | 317081  |
| 25 | (random\$ adj2 allocat\$).tw.                                                        | 51092   |
| 26 | ((singl\$ or doubl\$ or treb\$ or tripl\$) adj (blind\$3 or dumm\$3 or mask\$3)).tw. | 267990  |
| 27 | (crossover or cross over).tw.                                                        | 117949  |
| 28 | placebo\$.tw.                                                                        | 348438  |
| 29 | Prospective Study/                                                                   | 791679  |
| 30 | Clinical study/                                                                      | 160263  |
| 31 | exp case control study/                                                              | 210559  |
| 32 | longitudinal study/                                                                  | 177581  |
| 33 | retrospective study/                                                                 | 1300185 |
| 34 | cross-sectional study/                                                               | 501921  |
| 35 | cohort analysis/                                                                     | 889366  |
| 36 | case control.ti,ab.                                                                  | 191802  |

| #  | Searches                                                                                                                            | Results  |
|----|-------------------------------------------------------------------------------------------------------------------------------------|----------|
| 37 | (cohort adj (study or studies or analys\$)).ti,ab.                                                                                  | 425230   |
| 38 | ((follow up or observational) adj (study or studies)).ti,ab.                                                                        | 294611   |
| 39 | ((longitudinal or retrospective or prospective or cross sectional) adj (study or studies or review or analys\$ or cohort\$)).ti,ab. | 1597410  |
| 40 | exp post hoc analysis/                                                                                                              | 41582    |
| 41 | (post adj2 hoc).mp.                                                                                                                 | 81625    |
| 42 | systematic review/                                                                                                                  | 367083   |
| 43 | meta analysis/                                                                                                                      | 255753   |
| 44 | (meta analy\$ or metanaly\$ or metaanaly\$).mp.                                                                                     | 400954   |
| 45 | ((systematic or evidence) adj3 (review\$ or overview\$)).mp.                                                                        | 532819   |
| 46 | or/12-45                                                                                                                            | 6112187  |
| 47 | 11 and 46                                                                                                                           | 3136     |
| 48 | (animal\$ not human\$).mp.                                                                                                          | 4448337  |
| 49 | animal/ or animal experimentation/                                                                                                  | 4428446  |
| 50 | (animal/ not (animal/ and human/)) or (animal\$ not human\$).mp.                                                                    | 4503960  |
| 51 | animal/ or animal experiment/ or animal model/ or animal tissue/ or nonhuman/                                                       | 8980614  |
| 52 | (news or comment or editorial or note or case report or books or chapter or erratum).pt.                                            | 1957504  |
| 53 | case report/ or editorial/                                                                                                          | 3479859  |
| 54 | or/48-53                                                                                                                            | 13476801 |
| 55 | 47 not 54                                                                                                                           | 2448     |
| 56 | limit 55 to conference abstracts                                                                                                    | 919      |
| 57 | limit 56 to yr="1974 - 2019"                                                                                                        | 683      |

| #  | Searches                                                                                                                                                                                                                                                                                            | Results |
|----|-----------------------------------------------------------------------------------------------------------------------------------------------------------------------------------------------------------------------------------------------------------------------------------------------------|---------|
| 58 | 55 not 57                                                                                                                                                                                                                                                                                           | 1765    |
| 59 | limit 58 to (english or german)                                                                                                                                                                                                                                                                     | 1738    |
| #  | Searches                                                                                                                                                                                                                                                                                            | Results |
| 1  | exp backache/ or exp leg pain/                                                                                                                                                                                                                                                                      | 175720  |
| 2  | exp diabetic neuropathy/                                                                                                                                                                                                                                                                            | 27085   |
| 3  | exp peripheral neuropathy/                                                                                                                                                                                                                                                                          | 79580   |
| 4  | ((back or musculoskel* or intractabl* or leg or neuropath* or phantom limb or fantom limb or complex or regional or spinal cord) adj4 pain) or CRPS).mp.                                                                                                                                            | 216131  |
| 5  | (sciatica or back-ache or back*ache or lumbago or FBSS or PSPS or (diabet* adj3 neuropath*) or (peripheral adj3 neuropath*) or (reflex adj4 dystroph*) or (sudeck* adj2 atroph*) or causalg* or (failed back adj4 surg*) or (failed back adj4 syndrome*) or (persistent spinal adj4 syndrome*)).mp. | 170644  |
| 6  | or/1-5                                                                                                                                                                                                                                                                                              | 372015  |
| 7  | exp spinal cord stimulation/                                                                                                                                                                                                                                                                        | 8561    |
| 8  | ((spinal cord adj3 (stimulat* or electrostimulat*)) or (dorsal root adj3 (stimulat* or electrostimulat*)) or SCS or Dorsal root ganglion stimulation or DRGS).mp.                                                                                                                                   | 29926   |
| 9  | ((epidural adj3 (stimulat* or electrostimulat*)) or SENZA or neuromodul*).mp.                                                                                                                                                                                                                       | 69207   |
| 10 | or/7-9                                                                                                                                                                                                                                                                                              | 95108   |
| 11 | 6 and 10                                                                                                                                                                                                                                                                                            | 9733    |
| 12 | exp randomized controlled trial/                                                                                                                                                                                                                                                                    | 723637  |
| 13 | Clinical Trial/                                                                                                                                                                                                                                                                                     | 1040784 |
| 14 | controlled clinical trial/                                                                                                                                                                                                                                                                          | 466733  |

| #  | Searches                                                                             | Results |
|----|--------------------------------------------------------------------------------------|---------|
| 15 | multicenter study/                                                                   | 332373  |
| 16 | Phase 2 clinical trial/                                                              | 97999   |
| 17 | Phase 3 clinical trial/                                                              | 61879   |
| 18 | Phase 4 clinical trial/                                                              | 4881    |
| 19 | exp randomization/                                                                   | 94909   |
| 20 | Single Blind Procedure/                                                              | 47181   |
| 21 | Double Blind Procedure/                                                              | 197583  |
| 22 | Crossover Procedure/                                                                 | 71172   |
| 23 | Placebo/                                                                             | 383817  |
| 24 | (randomi?ed controlled trial\$ or rct).tw.                                           | 314362  |
| 25 | (random\$ adj2 allocat\$).tw.                                                        | 50858   |
| 26 | ((singl\$ or doubl\$ or treb\$ or tripl\$) adj (blind\$3 or dumm\$3 or mask\$3)).tw. | 266733  |
| 27 | (crossover or cross over).tw.                                                        | 117585  |
| 28 | placebo\$.tw.                                                                        | 346823  |
| 29 | Prospective Study/                                                                   | 786059  |
| 30 | Clinical study/                                                                      | 160007  |
| 31 | exp case control study/                                                              | 209691  |
| 32 | longitudinal study/                                                                  | 176636  |
| 33 | retrospective study/                                                                 | 1289057 |
| 34 | prospective study/                                                                   | 786059  |

| #  | Searches                                                                                                                            | Results |
|----|-------------------------------------------------------------------------------------------------------------------------------------|---------|
| 35 | cross-sectional study/                                                                                                              | 498476  |
| 36 | cohort analysis/                                                                                                                    | 879801  |
| 37 | case control.ti,ab.                                                                                                                 | 190891  |
| 38 | (cohort adj (study or studies or analys\$)).ti,ab.                                                                                  | 421167  |
| 39 | ((follow up or observational) adj (study or studies)).ti,ab.                                                                        | 292654  |
| 40 | ((longitudinal or retrospective or prospective or cross sectional) adj (study or studies or review or analys\$ or cohort\$)).ti,ab. | 1586996 |
| 41 | exp post hoc analysis/                                                                                                              | 41252   |
| 42 | (post adj2 hoc).mp.                                                                                                                 | 81075   |
| 43 | systematic review/                                                                                                                  | 363671  |
| 44 | meta analysis/                                                                                                                      | 253493  |
| 45 | (meta analy\$ or metanaly\$ or metaanaly\$).mp.                                                                                     | 397751  |
| 46 | ((systematic or evidence) adj3 (review\$ or overview\$)).mp.                                                                        | 528326  |
| 47 | or/12-46                                                                                                                            | 6074235 |
| 48 | 11 and 47                                                                                                                           | 3122    |
| 49 | (animal\$ not human\$).mp.                                                                                                          | 4441386 |
| 50 | animal/ or animal experimentation/                                                                                                  | 4418349 |
| 51 | (animal/ not (animal/ and human/)) or (animal\$ not human\$).mp.                                                                    | 4497019 |
| 52 | animal/ or animal experiment/ or animal model/ or animal tissue/ or nonhuman/                                                       | 8957815 |
| 53 | (news or comment or editorial or note or case report or books or chapter or erratum).pt.                                            | 1945917 |
| 54 | case report/ or editorial/                                                                                                          | 3468889 |



| #  | Searches                         | Results  |
|----|----------------------------------|----------|
| 55 | or/49-54                         | 13436497 |
| 56 | 48 not 55                        | 2434     |
| 57 | limit 56 to conference abstracts | 912      |
| 58 | limit 57 to yr="1974 - 2019"     | 683      |
| 59 | 56 not 58                        | 1751     |
| 60 | limit 59 to (english or german)  | 1724     |

**eTable 3.** MEDLINE search strategy (1946 to September 02, 2022)

| # | Searches                                                                                                                                                                                                                                                            | Results |
|---|---------------------------------------------------------------------------------------------------------------------------------------------------------------------------------------------------------------------------------------------------------------------|---------|
| 1 | exp Back Pain/                                                                                                                                                                                                                                                      | 43555   |
| 2 | exp Diabetic Neuropathies/                                                                                                                                                                                                                                          | 25597   |
| 3 | ((((back or musculoskel* or intractabl* or neuropath* or phantom limb or leg or fantom limb or complex or regional or spinal cord) adj4 pain) or CRPS).mp.                                                                                                          | 130542  |
| 4 | (sciatica or back-ache or back*ache or lumbago or FBSS or PSPS or (diabet* adj3 neuropath*) or (reflex adj4 dystroph*) or (sudeck* adj2 atroph*) or causalg* or (failed back adj4 surg*) or (failed back adj4 syndrome*) or (persistent spinal adj4 syndrome*)).mp. | 41300   |
| 5 | or/1-4                                                                                                                                                                                                                                                              | 169954  |
| 6 | exp Spinal Cord Stimulation/                                                                                                                                                                                                                                        | 1601    |
| 7 | ((spinal cord adj3 (stimulat* or electrostimulat*)) or (dorsal root adj3 (stimulat* or electrostimulat*)) or SCS or Dorsal root ganglion stimulation or DRGS).mp.                                                                                                   | 19322   |
| 8 | ((epidural adj3 (stimulat* or electrostimulat*)) or SENZA or neuromodul*).mp.                                                                                                                                                                                       | 23965   |

| #  | Searches                                                                             | Results |
|----|--------------------------------------------------------------------------------------|---------|
| 9  | or/6-8                                                                               | 41929   |
| 10 | 5 and 9                                                                              | 3472    |
| 11 | exp Randomized Controlled Trial/                                                     | 577753  |
| 12 | exp Random Allocation/                                                               | 106876  |
| 13 | Clinical Trial/                                                                      | 536037  |
| 14 | controlled clinical trial/                                                           | 95017   |
| 15 | multicenter study/                                                                   | 325200  |
| 16 | Single blind method/                                                                 | 32166   |
| 17 | Double blind method/                                                                 | 172937  |
| 18 | Placebo\$.tw.                                                                        | 238824  |
| 19 | (randomi?ed controlled trial\$ or rct).tw.                                           | 238414  |
| 20 | (random\$ adj2 allocat\$).tw.                                                        | 41375   |
| 21 | ((singl\$ or doubl\$ or treb\$ or tripl\$) adj (blind\$3 or dumm\$3 or mask\$3)).tw. | 191174  |
| 22 | (crossover or cross over).tw.                                                        | 94811   |
| 23 | prospective studies/                                                                 | 637627  |
| 24 | Clinical study/                                                                      | 5253    |
| 25 | exp Case-Control Studies/                                                            | 1350259 |
| 26 | longitudinal studies/                                                                | 160223  |
| 27 | retrospective studies/                                                               | 1055535 |
| 28 | cross-sectional studies/                                                             | 438802  |
| 29 | cohort studies/                                                                      | 318262  |

| #  | Searches                                                                                                                            | Results  |
|----|-------------------------------------------------------------------------------------------------------------------------------------|----------|
| 30 | case control.ti,ab.                                                                                                                 | 146191   |
| 31 | (cohort adj (study or studies or analys\$)).ti,ab.                                                                                  | 292829   |
| 32 | ((follow up or observational) adj (study or studies)).ti,ab.                                                                        | 199104   |
| 33 | ((longitudinal or retrospective or prospective or cross sectional) adj (study or studies or review or analys\$ or cohort\$)).ti,ab. | 1061586  |
| 34 | (post adj2 hoc).mp.                                                                                                                 | 42468    |
| 35 | systematic review/                                                                                                                  | 206003   |
| 36 | meta analysis/                                                                                                                      | 166784   |
| 37 | (meta analy\$ or metanaly\$ or metaanaly\$).mp.                                                                                     | 279280   |
| 38 | ((systematic or evidence) adj3 (review\$ or overview\$)).mp.                                                                        | 343294   |
| 39 | or/11-38                                                                                                                            | 4484767  |
| 40 | 10 and 39                                                                                                                           | 1039     |
| 41 | (animal\$ not human\$).mp.                                                                                                          | 4801419  |
| 42 | animal/ or animal experimentation/                                                                                                  | 7162521  |
| 43 | (animal/ not (animal/ and human/)) or (animal\$ not human\$).mp.                                                                    | 5112604  |
| 44 | animal/ or animal experiment/ or animal model/ or animal tissue/ or nonhuman/                                                       | 7162860  |
| 45 | (news or comment or editorial or note or case reports or books or chapter or erratum).pt.                                           | 3870035  |
| 46 | historical article/ or case reports/ or editorial/                                                                                  | 3259704  |
| 47 | or/41-46                                                                                                                            | 11242121 |
| 48 | 40 not 47                                                                                                                           | 946      |
| 49 | limit 48 to (english or german)                                                                                                     | 933      |

**eTable 4.** Cochrane search strategy (2005 to August 31, 2022)

| #  | Searches                                                                                                                                                                                                                                                            | Results |
|----|---------------------------------------------------------------------------------------------------------------------------------------------------------------------------------------------------------------------------------------------------------------------|---------|
| 1  | exp Back Pain/                                                                                                                                                                                                                                                      | 5706    |
| 2  | exp Diabetic Neuropathies/                                                                                                                                                                                                                                          | 2325    |
| 3  | ((((back or musculoskel* or intractabl* or leg or neuropath* or phantom limb or leg or fantom limb or complex or regional or spinal cord) adj4 pain) or CRPS).mp.                                                                                                   | 28652   |
| 4  | (sciatica or back-ache or back*ache or lumbago or FBSS or PSPS or (diabet* adj3 neuropath*) or (reflex adj4 dystroph*) or (sudeck* adj2 atroph*) or causalg* or (failed back adj4 surg*) or (failed back adj4 syndrome*) or (persistent spinal adj4 syndrome*)).mp. | 10792   |
| 5  | or/1-4                                                                                                                                                                                                                                                              | 36033   |
| 6  | exp Spinal Cord Stimulation/                                                                                                                                                                                                                                        | 92      |
| 7  | ((spinal cord adj3 (stimulat* or electrostimulat*)) or (dorsal root adj3 (stimulat* or electrostimulat*)) or SCS or Dorsal root ganglion stimulation or DRGS).mp.                                                                                                   | 1726    |
| 8  | ((epidural adj3 (stimulat* or electrostimulat*)) or SENZA or neuromodul*).mp.                                                                                                                                                                                       | 3215    |
| 9  | or/6-8                                                                                                                                                                                                                                                              | 4655    |
| 10 | 5 and 9                                                                                                                                                                                                                                                             | 926     |
| 11 | (animal\$ not human\$).mp.                                                                                                                                                                                                                                          | 5075    |
| 12 | animal/ or animal experimentation/                                                                                                                                                                                                                                  | 11236   |
| 13 | (animal/ not (animal/ and human/)) or (animal\$ not human\$).mp.                                                                                                                                                                                                    | 16261   |
| 14 | animal/ or animal experiment/ or animal model/ or animal tissue/ or nonhuman/                                                                                                                                                                                       | 11243   |
| 15 | (news or comment or editorial or note or case reports or books or chapter or erratum).pt.                                                                                                                                                                           | 5155    |
| 16 | or/11-15                                                                                                                                                                                                                                                            | 21410   |
| 17 | 10 not 16                                                                                                                                                                                                                                                           | 921     |
| 18 | limit 17 to (english or german) [Limit not valid in CDSR; records were retained]                                                                                                                                                                                    | 918     |

**eTable 5.** Summary of available patient characteristics across included studies

| N | Study name (NCT/trial registration number) | Population for baseline characteristics | Clinical condition      | Site of pain                                     | Mean age, years (range)  | Male, n (%) | Mean time since FBSS/surgery onset, years (range) |
|---|--------------------------------------------|-----------------------------------------|-------------------------|--------------------------------------------------|--------------------------|-------------|---------------------------------------------------|
| 1 | PROCESS (ISRCTN77527324)                   | SCS+CMM, N=52                           | Neuropathic pain, FBSS  | Leg and back                                     | 48.90 (SD=10.00)         | 30 (58.00)  | 4.7 (SD=5.10)                                     |
|   |                                            | CMM, N=48                               | Neuropathic pain, FBSS  | Leg and back                                     | 48.90 (SD=10.00)         | 30 (58.00)  | 4.7 (SD=5.10)                                     |
| 2 | SENZA-PDN (NCT03228420)                    | 10 kHz SCS + CMM, N=113                 | Neuropathic pain, PDN   | Leg                                              | 60.70 (55-70, SD=11.40)  | 70 (61.90)  | NR                                                |
|   |                                            | CMM, N= 103                             | Neuropathic pain, PDN   | Leg                                              | 60.80 (55-67.5, SD=9.90) | 66 (64.10)  | NR                                                |
| 3 | de Vos 2014 (ISRCTN03269533)               | SCS + CMP, N=40                         | Neuropathic pain, PDN   | Leg                                              | 58.00 (SD=11.00)         | 25 (62.50)  | NR                                                |
|   |                                            | CMP, N=20                               | Neuropathic pain, PDN   | Leg                                              | 61.00 (SD=12.00)         | 13 (65.00)  | NR                                                |
| 4 | PROMISE (NCT01697358)                      | SCS + OMM, N=110                        | Neuropathic pain, FBSS  | Back and leg                                     | 52.80 (SD=12.50)         | 42 (38.20)  | 5.30 (SD=6.2)                                     |
|   |                                            | OMM, N=108                              | Neuropathic pain, FBSS  | Back and leg                                     | 55.10 (SD=10.20)         | 44 (40.70)  | 5.60 (SD=5.5)                                     |
| 5 | Slangen 2014 (NCT01162993)                 | SCS + BMT, N=22                         | Neuropathic pain, PDPN  | Lower limb                                       | 57.10 (SD=12.40)         | 15 (68.00)  | NR                                                |
|   |                                            | BMT, N=14                               | Neuropathic pain, PDPN  | Lower limb                                       | 56.50 (SD=8.00)          | 9 (64.00)   | NR                                                |
| 6 | Kapural 2022 (NCT03680846)                 | 10 kHz SCS + CMM, N=83                  | Neuropathic pain, NSRBP | Back and leg                                     | Median=53.00 (29-87)     | 36 (47.40)  | NR                                                |
|   |                                            | CMM, N=76                               | Neuropathic pain, NSRBP | Back and leg                                     | Median=58.50 (26-77)     | 23 (46.00)  | NR                                                |
| 7 | De Andres 2017 (NR)                        | High- Frequency SCS, N=26               | Neuropathic pain, FBSS  | Mainly axial low back pain or radiating leg pain | 51.62 (SD=9.31)          | 15 (57.70)  | NR                                                |
|   |                                            | Conventional SCS, N=29                  | Neuropathic pain, FBSS  | Mainly axial low back pain or radiating leg pain | 53.79 (SD=11.46)         | 11 (37.90)  | NR                                                |

| <b>N</b>  | <b>Study name<br/>(NCT/trial<br/>registration<br/>number)</b> | <b>Population for<br/>baseline<br/>characteristics</b> | <b>Clinical<br/>condition</b>                                                        | <b>Site of pain</b>                     | <b>Mean age, years<br/>(range)</b> | <b>Male, n (%)</b> | <b>Mean time since<br/>FBSS/surgery<br/>onset, years<br/>(range)</b> |
|-----------|---------------------------------------------------------------|--------------------------------------------------------|--------------------------------------------------------------------------------------|-----------------------------------------|------------------------------------|--------------------|----------------------------------------------------------------------|
| <b>8</b>  | SURF<br>(NR)                                                  | High-frequency (10-<br>kHz stimulation)<br>WSCS, N=50  | Neuropathic<br>pain, FBSS                                                            | Chronic back<br>or back and<br>leg pain | 59.40 (SD=12.00)                   | 23 (46.00)         | NR                                                                   |
|           |                                                               | Low frequency (10-<br>1500-Hz) WSCS,<br>N=49           | Neuropathic<br>pain, FBSS                                                            | Chronic back<br>or back and<br>leg pain | 59.00 (SD=11.00)                   | 27 (55.00)         | NR                                                                   |
| <b>9</b>  | Al-kaisy 2021<br>(NR)                                         | SCS 10 kHz + CMM,<br>N=NR                              | Non-neuropathic<br>pain, chronic<br>NSRBP                                            | Back and leg                            | NR                                 | NR                 | NR                                                                   |
|           |                                                               | CMM, N=NR                                              | Non-neuropathic<br>pain, chronic<br>NSRBP                                            | Back and leg                            | NR                                 | NR                 | NR                                                                   |
| <b>10</b> | Evoke<br>(NCT02924129)                                        | Closed-loop SCS<br>(ECAP-controlled),<br>N=67          | Mixed<br>population,<br>Chronic,<br>intractable pain<br>of the back and<br>legs      | Leg and<br>back                         | 54.60 (SD=9.70)                    | 34 (51.00)         | NR                                                                   |
|           |                                                               | Open-loop SCS<br>(manual stimulation),<br>N=67         | Mixed<br>population,<br>Chronic,<br>intractable pain<br>of the back and<br>legs      | Leg and<br>back                         | 55.90 (SD=11.60)                   | 35 (52.00)         | NR                                                                   |
| <b>11</b> | SENZA-RCT<br>(NCT01609972)                                    | High-frequency<br>Therapy SCS,<br>N=101                | Mixed<br>population,<br>Chronic,<br>intractable pain<br>of the trunk<br>and/or limbs | Limbs and<br>trunk                      | 54.60 (SD=12.40)                   | 35 (38.00)         | NR                                                                   |
|           |                                                               | Low-frequency<br>Therapy SCS, N=97                     | Mixed<br>population,<br>Chronic,<br>intractable pain<br>of the trunk<br>and/or limbs | Limbs and<br>trunk                      | 55.20 (SD=13.40)                   | 36 (41.40)         | NR                                                                   |

| <b>N</b>  | <b>Study name<br/>(NCT/trial<br/>registration<br/>number)</b> | <b>Population for<br/>baseline<br/>characteristics</b> | <b>Clinical<br/>condition</b>                                                    | <b>Site of pain</b> | <b>Mean age, years<br/>(range)</b> | <b>Male, n (%)</b> | <b>Mean time since<br/>FBSS/surgery<br/>onset, years<br/>(range)</b> |
|-----------|---------------------------------------------------------------|--------------------------------------------------------|----------------------------------------------------------------------------------|---------------------|------------------------------------|--------------------|----------------------------------------------------------------------|
| <b>12</b> | SGX-SCS-RCT<br>(NCT03606187)                                  | DTM SCS, N=67                                          | Mixed<br>population,<br>Chronic LBP,<br>and leg pain                             | Back and leg        | 61.28 (SD=12.16)                   | 33 (49.30)         | NR                                                                   |
|           |                                                               | Traditional SCS,<br>N=61                               | Mixed<br>population,<br>Chronic LBP,<br>and leg pain                             | Back and leg        | 60.66 (SD=11.77)                   | 27 (44.30)         | NR                                                                   |
| <b>13</b> | SUNBURST<br>(NCT02011893)                                     | Burst stimulation<br>SCS, N=55                         | Mixed<br>population,<br>Chronic<br>intractable pain<br>in the limbs and<br>trunk | Limbs and<br>trunk  | 60.40 (SD=13.40)                   | 24 (43.60)         | NR                                                                   |
|           |                                                               | Tonic stimulation<br>SCS, N=45                         | Mixed<br>population,<br>Chronic<br>intractable pain<br>in the limbs and<br>trunk | Limbs and<br>trunk  | 58.80 (SD=13.60)                   | 19 (42.20)         | NR                                                                   |

Abbreviations:  $\mu$ S, Microseconds; BMT, Best medical treatment; CMM, Conventional medical management; CMP, Conventional medical practice; CRPS, Complex regional pain syndrome; CRPS I, Complex regional pain syndrome type I; DRGS, Dorsal root ganglion stimulation; DTM SCS, Differential Target Multiplexed spinal cord stimulation; ECAP, Evoked compound action potential; FBSS, Failed Back Surgery Syndrome; kHz, Kilohertz; LBP, Low back pain; NR, Not reported; NRS, Numeric Rating Scale; NSRBP, Non-surgical refractory back pain; OMM, Optimal Medical Management; PDN, Painful diabetic neuropathy; PDPN, Painful diabetic peripheral neuropathy; PNFS, Peripheral nerve field stimulation; SCS, Spinal cord stimulation; SCS CME, Conventional spinal cord stimulation method; SCS EME, Experimental spinal cord stimulation method; SD, Standard deviation; SLR, Systematic literature review; WSCS, Wireless extracorporeal SCS

**eTable 6.** Study results for evidence synthesis of the included studies

| N         | Study name (NCT/trial registration number) | Treatments, sample size, N | Timepoints | Pain site     | Sample size, n | Pain reduction/relief ≥50%, n (%) | Pain intensity/scores, mean (SD) | EQ-5D index score, mean (SD) | Disability (ODI), mean (SD) |
|-----------|--------------------------------------------|----------------------------|------------|---------------|----------------|-----------------------------------|----------------------------------|------------------------------|-----------------------------|
| 1         | PROCESS (ISRCTN77527324)                   | SCS+CMM                    | 3 months   | Back          | 50             | VAS: 28 (56.0)                    | VAS: 41.02 (NR)                  | 0.49 (0.32)                  | 43.03 (15.65)               |
|           |                                            |                            |            | Leg           |                | VAS: 28 (56.0)                    | VAS: 35.1 (NR)                   |                              |                             |
|           |                                            |                            | 6 months   | Back          |                | VAS: 14 (28.0)                    | VAS: 40.6 (24.9)                 | 0.47 (0.32)                  | 44.9 (18.8)                 |
|           |                                            |                            |            | Leg           |                | VAS: 24 (48.0)                    | VAS: 39.9 (26.3)                 |                              |                             |
|           |                                            |                            | 12 months  | Back          |                | NR                                | NR                               | NR                           | NR                          |
|           |                                            |                            |            | Leg           |                | 47                                | VAS: 16 (34.0)                   | NR                           | NR                          |
|           |                                            |                            | 24 months  | Back          |                | NR                                | NR                               | NR                           | NR                          |
|           |                                            |                            |            | Leg           |                | 52                                | VAS: 17 (32.7)                   | NR                           | NR                          |
|           |                                            | CMM                        | 3 months   | Back          | 44             | VAS: 4 (9.1)                      | VAS: 51.07 (NR)                  | 0.22 (0.32)                  | 55.76 (46.65)               |
|           |                                            |                            |            | Leg           |                | VAS: 4 (9.1)                      | VAS: 68.66 (NR)                  |                              |                             |
|           |                                            |                            | 6 months   | Back          |                | VAS: 5 (11.4)                     | VAS: 51.6 (26.7)                 | 0.25 (0.32)                  | 56.1 (17.9)                 |
|           |                                            |                            |            | Leg           |                | VAS: 4 (9.1)                      | VAS: 66.6 (24)                   |                              |                             |
|           |                                            |                            | 12 months  | Back          |                | NR                                | NR                               | NR                           | NR                          |
|           |                                            |                            |            | Leg           |                | 41                                | VAS: 3 (7.1)                     | NR                           | NR                          |
| 24 months | Back                                       |                            | NR         | NR            |                | NR                                | NR                               |                              |                             |
|           | Leg                                        |                            | 48         | VAS: 8 (16.7) |                | NR                                | NR                               |                              |                             |
| 2         |                                            |                            | 3 months   | Back          | NR             | NR                                | NR                               |                              | NR                          |



| N        | Study name (NCT/trial registration number) | Treatments, sample size, N | Timepoints                   | Pain site    | Sample size, n | Pain reduction/relief $\geq 50\%$ , n (%) | Pain intensity/scores, mean (SD) | EQ-5D index score, mean (SD) | Disability (ODI), mean (SD) |
|----------|--------------------------------------------|----------------------------|------------------------------|--------------|----------------|-------------------------------------------|----------------------------------|------------------------------|-----------------------------|
|          | SENZA-PDN (NCT03228420)                    | 10 kHz SCS + CMM           |                              | Leg          | 88             | VAS: 78 (88.6)                            | NR                               | 0.77 (0.14)                  |                             |
|          |                                            |                            |                              | 6 months     | Back           | NR                                        | NR                               | NR                           |                             |
|          |                                            |                            |                              | Leg          | 87             | VAS: 74 (85.1)                            | VAS: 1.7 (1.9)                   |                              |                             |
|          |                                            | CMM                        | 3 months                     | Back         | NR             | NR                                        | NR                               | 0.62 (0.15)                  | NR                          |
|          |                                            |                            |                              | Leg          | 96             | VAS: 7 (72.9)                             | NR                               |                              |                             |
|          |                                            |                            | 6 months                     | Back         | NR             | NR                                        | NR                               | 0.60 (0.15)                  | NR                          |
|          |                                            | Leg                        | 93                           | VAS: 5 (5.4) | VAS: 6.9 (2.1) |                                           |                                  |                              |                             |
|          |                                            | 3                          | de Vos 2014 (ISRCTN03269533) | SCS + CMP    | 3 months       | Back                                      | NR                               | NR                           | NR                          |
| Leg      | NR                                         |                            |                              |              |                | NR                                        | VAS: 28.8 (95.2)                 |                              |                             |
| 6 months | Back                                       |                            |                              |              | NR             | NR                                        | NR                               | 0.65 (0.28)                  | NR                          |
|          | Leg                                        |                            |                              |              | 40             | VAS: 25 (62.5)                            | VAS: 31 (28)                     |                              |                             |
| CMP      | 3 months                                   |                            |                              | Back         | NR             | NR                                        | NR                               | NR                           | NR                          |
|          |                                            |                            |                              | Leg          | NR             | NR                                        | VAS: 70.5 (65.3)                 |                              |                             |
|          | 6 months                                   |                            |                              | Back         | NR             | NR                                        | NR                               | 0.44(0.33)                   | NR                          |
|          |                                            |                            |                              | Leg          | 20             | VAS: 1 (5.0)                              | VAS: 67 (21)                     |                              |                             |
| 4        | PROMISE (NCT01697358)                      | SCS + OMM                  | 3 months                     | Back         | NR             | NR                                        | NR                               | NR                           | NR                          |
|          |                                            |                            |                              | Leg          | NR             | NR                                        | NR                               |                              |                             |

| N        | Study name (NCT/trial registration number) | Treatments, sample size, N | Timepoints   | Pain site  | Sample size, n | Pain reduction/relief $\geq 50\%$ , n (%) | Pain intensity/scores, mean (SD) | EQ-5D index score, mean (SD) | Disability (ODI), mean (SD) |
|----------|--------------------------------------------|----------------------------|--------------|------------|----------------|-------------------------------------------|----------------------------------|------------------------------|-----------------------------|
|          |                                            |                            | 6 months     | Back       | 110            | VAS: 15 (13.6)                            | VAS: 6.0 (2.1)                   | 0.49 (0.27)                  | 46.9 (17.1)                 |
|          |                                            |                            |              | Leg        | 110            | VAS: 33 (30.0)                            | VAS: 4.2 (2.4)                   |                              |                             |
|          |                                            | OMM                        | 3 months     | Back       | NR             | NR                                        | NR                               | NR                           | NR                          |
|          |                                            |                            |              | Leg        | NR             | NR                                        | NR                               |                              |                             |
|          |                                            |                            | 6 months     | Back       | 108            | VAS: 5 (4.6)                              | 7.2 (1.9)                        | 0.38 (0.27)                  | 53.1 (17.9)                 |
|          |                                            |                            |              | Leg        | 108            | VAS: 9 (8.3)                              | VAS: 5.4 (2.4)                   |                              |                             |
| 5        | Slangen 2014 (NCT01162993)                 | SCS + BMT                  | 3 months     | Back       | NR             | NR                                        | NR                               | 0.54 (0.37)                  | NR                          |
|          |                                            |                            |              | Leg        | 22             | VAS: 16 (72.7)                            | VAS: 3.4 (2.6)                   |                              |                             |
|          |                                            |                            | 6 months     | Back       | NR             | NR                                        | NR                               | 0.50 (0.38)                  | NR                          |
|          |                                            |                            |              | Leg        | 22             | VAS: 13 (59.1)                            | VAS: 3.95 (3.0)                  |                              |                             |
|          |                                            | BMT                        | 3 months     | Back       | NR             | NR                                        | NR                               | 0.41 (0.34)                  | NR                          |
|          |                                            |                            |              | Leg        | 14             | VAS: 0 (0)                                | 6.8 (1.9)                        |                              |                             |
| 6 months | Back                                       | NR                         | NR           | NR         | 0.33 (0.34)    | NR                                        |                                  |                              |                             |
|          | Leg                                        | 14                         | VAS: 1 (7.1) | 6.45 (2.0) |                |                                           |                                  |                              |                             |
| 6        | Kapural 2022 (NCT03680846)                 | 10 kHz SCS + CMM, N=83     | 3 months     | NR         | NR             | NR                                        | NR                               | 0.79 (0.55)                  | NR                          |
|          |                                            |                            |              | NR         | NR             | NR                                        | NR                               |                              |                             |
|          |                                            |                            | 6 months     | NR         | NR             | NR                                        | NR                               | 0.78 (0.45)                  | NR                          |
|          |                                            |                            |              | NR         | NR             | NR                                        | NR                               |                              |                             |

| N | Study name (NCT/trial registration number) | Treatments, sample size, N                     | Timepoints | Pain site | Sample size, n | Pain reduction/relief $\geq 50\%$ , n (%) | Pain intensity/scores, mean (SD) | EQ-5D index score, mean (SD) | Disability (ODI), mean (SD) |
|---|--------------------------------------------|------------------------------------------------|------------|-----------|----------------|-------------------------------------------|----------------------------------|------------------------------|-----------------------------|
|   |                                            | CMM, N=76                                      | 3 months   | NR        | NR             | NR                                        | NR                               | 0.56 (0.64)                  | NR                          |
|   |                                            |                                                |            | NR        | NR             | NR                                        | NR                               |                              |                             |
|   |                                            |                                                | 6 months   | NR        | NR             | NR                                        | NR                               | 0.52 (0.71)                  | NR                          |
|   |                                            |                                                |            | NR        | NR             | NR                                        | NR                               |                              |                             |
| 7 | De Andres 2017 (NR)                        | High-Frequency SCS, N=26                       | 3 months   | Back      | NR             | NR                                        | NRS: 5.98 (2.6)                  | NR                           | 21.85 (8.59)                |
|   |                                            |                                                |            | Leg       | NR             | NR                                        | NRS: 5.98 (2.6)                  |                              |                             |
|   |                                            |                                                | 6 months   | Back      | NR             | NR                                        | NRS: 5.83 (2.2)                  | NR                           | 22.9 (6.7)                  |
|   |                                            |                                                |            | Leg       | NR             | NR                                        | NRS: 5.83 (2.2)                  |                              |                             |
|   |                                            | Conventional SCS, N=29                         | 3 months   | Back      | NR             | NR                                        | NRS: 5.71 (1.7)                  | NR                           | 20.55 (8.32)                |
|   |                                            |                                                |            | Leg       | NR             | NR                                        | NRS: 5.71 (1.7)                  |                              |                             |
|   |                                            |                                                | 6 months   | Back      | NR             | NR                                        | NRS: 5.78 (1.9)                  | NR                           | 21.1 (9.9)                  |
|   |                                            |                                                |            | Leg       | NR             | NR                                        | NRS: 5.78 (1.9)                  |                              |                             |
| 8 | SURF (NR)                                  | High-frequency (10-kHz stimulation) WSCS, N=50 | 3 months   | Back      | NR             | NR                                        | VAS: 22.6 (13.6)                 | NR                           | NR                          |
|   |                                            |                                                |            | Leg       | NR             | NR                                        | VAS: 21.7 (20.6)                 |                              |                             |
|   |                                            |                                                | 6 months   | Back      | 38             | VAS: 35 (92.1)                            | VAS: 17.8 (14.1)                 | NR                           | NR                          |
|   |                                            |                                                |            | Leg       | NR             | NR                                        | VAS: 13.3 (14.1)                 |                              |                             |
|   |                                            | Low frequency (10-1500-                        | 3 months   | Back      | NR             | NR                                        | VAS: 29.6 (16.6)                 | NR                           | NR                          |
|   |                                            |                                                |            | Leg       | NR             | NR                                        | VAS: 26.5 (24.3)                 |                              |                             |

| N  | Study name (NCT/trial registration number) | Treatments, sample size, N              | Timepoints | Pain site | Sample size, n | Pain reduction/relief $\geq 50\%$ , n (%) | Pain intensity/scores, mean (SD) | EQ-5D index score, mean (SD) | Disability (ODI), mean (SD) |
|----|--------------------------------------------|-----------------------------------------|------------|-----------|----------------|-------------------------------------------|----------------------------------|------------------------------|-----------------------------|
|    |                                            | Hz) WSCS, N=49                          | 6 months   | Back      | 34             | VAS: 28 (82.4)                            | VAS: 27.8 (23.2)                 | NR                           | NR                          |
|    |                                            |                                         |            | Leg       | NR             | NR                                        | VAS: 22.3 (24.4)                 |                              |                             |
| 9  | Al-kaisy 2021 (NR)                         | SCS 10 kHz + CMM, N=NR                  | 3 months   | Back      | NR             | NR                                        | NR                               | NR                           | NR                          |
|    |                                            |                                         |            | Leg       | NR             | NR                                        | 1.3 (NR)                         |                              |                             |
|    |                                            |                                         | 6 months   | Back      | NR             | NR                                        | NR                               | NR                           | NR                          |
|    |                                            |                                         |            | Leg       | NR             | NR                                        | 1.8 (NR)                         |                              |                             |
|    |                                            | CMM, N=NR                               | 3 months   | Back      | NR             | NR                                        | NR                               | NR                           | NR                          |
|    |                                            |                                         |            | Leg       | NR             | NR                                        | 6.5 (NR)                         |                              |                             |
|    |                                            |                                         | 6 months   | Back      | NR             | NR                                        | NR                               | NR                           | NR                          |
|    |                                            |                                         |            | Leg       | NR             | NR                                        | 6.5 (NR)                         |                              |                             |
| 10 | Evoke (NCT02924129)                        | Closed-loop SCS (ECAP-controlled), N=67 | 3 months   | Back      | 62             | VAS: 50 (80.6)                            | VAS: 22.7 (10.2)                 | 0.67 (0.15)                  | NR                          |
|    |                                            |                                         |            | Leg       | 62             | VAS: 50 (80.6)                            | VAS: 82.2 (10.8)                 |                              |                             |
|    |                                            |                                         | 6 months   | Back      | NR             | NR                                        | NR                               | NR                           | NR                          |
|    |                                            |                                         |            | Leg       | NR             | NR                                        | NR                               |                              |                             |
|    |                                            |                                         | 12 months  | Back      | NR             | NR                                        | NR                               | NR                           | NR                          |
|    |                                            |                                         |            | Leg       | 59             | VAS: 49 (83.1)                            | NR                               |                              |                             |
|    |                                            |                                         | 24 months  | Back      | NR             | NR                                        | NR                               | NR                           | NR                          |

| N         | Study name (NCT/trial registration number) | Treatments, sample size, N               | Timepoints     | Pain site      | Sample size, n | Pain reduction/relief ≥50%, n (%) | Pain intensity/scores, mean (SD) | EQ-5D index score, mean (SD) | Disability (ODI), mean (SD) |
|-----------|--------------------------------------------|------------------------------------------|----------------|----------------|----------------|-----------------------------------|----------------------------------|------------------------------|-----------------------------|
|           |                                            | Open-loop SCS (manual stimulation), N=67 |                | Leg            | 59             | VAS: 49 (83.1)                    | NR                               | 0.66 (0.12)                  | NR                          |
|           |                                            |                                          |                | 3 months       | Back           | 63                                | VAS: 36 (57.1)                   |                              |                             |
|           |                                            |                                          | 3 months       | Leg            | 63             | VAS: 43 (81.1)                    | VAS: 80.0 (9.9)                  | NR                           | NR                          |
|           |                                            |                                          |                | 6 months       | Back           | NR                                | NR                               |                              |                             |
|           |                                            |                                          | 6 months       | Leg            | NR             | NR                                | NR                               | NR                           | NR                          |
|           |                                            |                                          |                | 12 months      | Back           | NR                                | NR                               |                              |                             |
|           |                                            |                                          | 12 months      | Leg            | 59             | VAS: 36 (61.0)                    | NR                               | NR                           | NR                          |
|           |                                            |                                          |                | 24 months      | Back           | NR                                | NR                               |                              |                             |
|           |                                            |                                          | 24 months      | Leg            | 54             | VAS: 34 (63.0)                    | NR                               | NR                           | NR                          |
|           |                                            |                                          |                | 3 months       | Back           | 90                                | VAS: 76 (84.4)                   |                              |                             |
|           |                                            |                                          | Leg            |                | 90             | VAS: 75 (83.3)                    | VAS: 1.87 (2.0)                  |                              |                             |
|           |                                            |                                          | 6 months       | Back           | 90             | VAS: 69 (76.7)                    | VAS: 2.62 (1.75)                 | NR                           | NR                          |
| Leg       | 90                                         | VAS: 73 (81.1)                           |                | VAS: 2.3 (2.0) |                |                                   |                                  |                              |                             |
| 12 months | Back                                       | NR                                       | NR             | NR             | NR             | NR                                |                                  |                              |                             |
|           | Leg                                        | 90                                       | VAS: 71 (78.9) | NR             |                |                                   |                                  |                              |                             |
| 24 months | Back                                       | NR                                       | NR             | NR             | NR             | NR                                |                                  |                              |                             |
|           | Leg                                        | 85                                       | VAS: 62 (72.9) | NR             |                |                                   |                                  |                              |                             |

| N                        | Study name<br>(NCT/trial<br>registration<br>number) | Treatments,<br>sample<br>size, N          | Timepoints | Pain<br>site                 | Sample<br>size, n | Pain<br>reduction/relief<br>≥50%, n (%) | Pain<br>intensity/scores,<br>mean (SD) | EQ-5D<br>index<br>score,<br>mean<br>(SD) | Disability<br>(ODI),<br>mean<br>(SD) |                  |    |    |
|--------------------------|-----------------------------------------------------|-------------------------------------------|------------|------------------------------|-------------------|-----------------------------------------|----------------------------------------|------------------------------------------|--------------------------------------|------------------|----|----|
| 12                       | SGX-SCS-RCT<br>(NCT03606187)                        | Low-<br>frequency<br>Therapy<br>SCS, N=97 | 3 months   | Back                         | 81                | VAS: 35 (43.2)                          | VAS: 4.23 (2.05)                       | NR                                       | NR                                   |                  |    |    |
|                          |                                                     |                                           |            | Leg                          | 81                | VAS: 45 (55.6)                          | VAS: 3.43 (2.1)                        |                                          |                                      |                  |    |    |
|                          |                                                     |                                           | 6 months   | Back                         | 81                | VAS: 42 (51.9)                          | VAS: 4.2 (2.05)                        | NR                                       | NR                                   |                  |    |    |
|                          |                                                     |                                           |            | Leg                          | 81                | VAS: 44 (54.3)                          | VAS: 3.52 (2.1)                        |                                          |                                      |                  |    |    |
|                          |                                                     |                                           | 12 months  | Back                         | NR                | NR                                      | NR                                     | NR                                       | NR                                   |                  |    |    |
|                          |                                                     |                                           |            | Leg                          | 81                | VAS: 42 (51.9)                          | NR                                     |                                          |                                      |                  |    |    |
|                          |                                                     |                                           | 24 months  | Back                         | NR                | NR                                      | NR                                     | NR                                       | NR                                   |                  |    |    |
|                          |                                                     |                                           |            | Leg                          | 71                | VAS: 35 (49.3)                          | NR                                     |                                          |                                      |                  |    |    |
|                          |                                                     |                                           | 12         | SGX-SCS-RCT<br>(NCT03606187) | DTM SCS,<br>N=67  | 3 months                                | Back                                   | 67                                       | VAS: 54 (80.6)                       | VAS: 1.91 (1.04) | NR | NR |
|                          |                                                     |                                           |            |                              |                   |                                         | Leg                                    | 67                                       | VAS: 52 (77.6)                       | VAS: 2.07 (1.9)  |    |    |
|                          |                                                     |                                           |            |                              |                   | 6 months                                | Back                                   | 67                                       | VAS: 50 (74.6)                       | VAS: 2.39 (3.8)  | NR | NR |
|                          |                                                     |                                           |            |                              |                   |                                         | Leg                                    | 33                                       | VAS: 25 (75.8)                       | VAS: 2.08 (1.5)  |    |    |
|                          |                                                     |                                           |            |                              |                   | 12 months                               | Back                                   | NR                                       | NR                                   | NR               | NR | NR |
|                          |                                                     |                                           |            |                              |                   |                                         | Leg                                    | 67                                       | VAS: 53 (79.1)                       | NR               |    |    |
| Traditional<br>SCS, N=61 | 3 months                                            | Back                                      |            |                              |                   | 61                                      | VAS: 31 (50.8)                         | VAS: 3.95 (1.2)                          | NR                                   | NR               |    |    |
|                          |                                                     | Leg                                       |            |                              |                   | 61                                      | VAS: 44 (72.1)                         | VAS: 2.58 (1.8)                          |                                      |                  |    |    |
|                          | 6 months                                            | Back                                      |            |                              |                   | 61                                      | VAS: 31 (50.8)                         | VAS: 3.86 (1.4)                          | NR                                   | NR               |    |    |

| N  | Study name (NCT/trial registration number) | Treatments, sample size, N  | Timepoints | Pain site | Sample size, n | Pain reduction/relief ≥50%, n (%) | Pain intensity/scores, mean (SD) | EQ-5D index score, mean (SD) | Disability (ODI), mean (SD) |
|----|--------------------------------------------|-----------------------------|------------|-----------|----------------|-----------------------------------|----------------------------------|------------------------------|-----------------------------|
|    |                                            |                             |            | Leg       | 39             | VAS: 24 (61.5)                    | VAS: 2.58 (1.8)                  |                              |                             |
|    |                                            |                             | 12 months  | Back      | NR             | NR                                | NR                               | NR                           | NR                          |
|    |                                            |                             |            | Leg       | 61             | VAS: 46 (75.4)                    | NR                               |                              |                             |
| 13 | SUNBURST (NCT02011893)                     | Burst stimulation SCS, N=55 | 3 months   | Back      | NR             | NR                                | VAS: 40.6 (25.5)                 | NR                           | NR                          |
|    |                                            |                             |            | Leg       | NR             | NR                                | VAS: 33.71 (3.73)                |                              |                             |
|    |                                            |                             | 6 months   | Back      | NR             | NR                                | NR                               | NR                           | NR                          |
|    |                                            |                             |            | Leg       | NR             | NR                                | NR                               |                              |                             |
|    |                                            | Tonic stimulation SCS, N=45 | 3 months   | Back      | NR             | NR                                | VAS: 42.62 (20.7)                | NR                           | NR                          |
|    |                                            |                             |            | Leg       | NR             | NR                                | VAS: 35.76 (3.52)                |                              |                             |
|    |                                            |                             | 6 months   | Back      | NR             | NR                                | NR                               | NR                           | NR                          |
|    |                                            |                             |            | Leg       | NR             | NR                                | NR                               |                              |                             |

Abbreviations:  $\mu$ S, Microseconds; BMT, Best medical treatment; CMM, Conventional medical management; CMP, Conventional medical practice; CRPS, Complex regional pain syndrome; CRPS I, Complex regional pain syndrome type I; DRGS, Dorsal root ganglion stimulation; DTM SCS, Differential Target Multiplexed spinal cord stimulation; ECAP, Evoked compound action potential; FBSS, Failed Back Surgery Syndrome; kHz, Kilohertz; LBP, Low back pain; NR, Not reported; NRS, Numeric Rating Scale; NSRBP, Non-surgical refractory back pain; OMM, Optimal Medical Management; PDN, Painful diabetic neuropathy; PDPN, Painful diabetic peripheral neuropathy; PNFS, Peripheral nerve field stimulation; SCS, Spinal cord stimulation; SCS CME, Conventional spinal cord stimulation method; SCS EME, Experimental spinal cord stimulation method; SD, Standard deviation; SLR, Systematic literature review; WSCS, Wireless extracorporeal SCS

**eTable 7.** Prior distributions used in the Bayesian NMAs for all outcomes.

| Outcome                                                             | Timepoint | Intercept       | Treatment      | Tau (only for RE)  |
|---------------------------------------------------------------------|-----------|-----------------|----------------|--------------------|
| Proportion of patients achieving $\geq 50\%$ pain reduction in back | 3 months  | Normal (0, 4)   | Normal (0, 4)  | Half-Normal (0, 4) |
|                                                                     | 6 months  | Normal (0, 4)   | Normal (0, 4)  | Half-Normal (0, 4) |
| Proportion of patients achieving $\geq 50\%$ pain reduction in leg  | 3 months  | Normal (0, 4)   | Normal (0, 4)  | Half-Normal (0, 4) |
|                                                                     | 6 months  | Normal (0, 4)   | Normal (0, 4)  | Half-Normal (0, 4) |
|                                                                     | 12 months | Normal (0, 4)   | Normal (0, 4)  | Half-Normal (0, 4) |
|                                                                     | 24 months | Normal (0, 4)   | Normal (0, 4)  | Half-Normal (0, 4) |
| Pain intensity in back                                              | 3 months  | Normal (0, 100) | Normal (0, 10) | Half-Normal (0, 5) |
|                                                                     | 6 months  | Normal (0, 100) | Normal (0, 10) | Half-Normal (0, 5) |
| Pain intensity in leg                                               | 3 months  | Normal (0, 100) | Normal (0, 10) | Half-Normal (0, 5) |
|                                                                     | 6 months  | Normal (0, 100) | Normal (0, 10) | Half-Normal (0, 5) |
| EQ-5D index score                                                   | 3 months  | Normal (0, 100) | Normal (0, 10) | Half-Normal (0, 5) |
|                                                                     | 6 months  | Normal (0, 100) | Normal (0, 10) | Half-Normal (0, 5) |
| Functional disability (ODI)                                         | 3 months  | Normal (0, 100) | Normal (0, 10) | Half-Normal (0, 5) |
|                                                                     | 6 months  | Normal (0, 100) | Normal (0, 10) | Half-Normal (0, 5) |

Abbreviations: EQ-5D: Euroqol 5-Dimensions; NMA: network meta-analysis; RE: random effects; ODI: Oswestry Disability Index

Note: all distributions parameters are presented as follows: Normal ( $\mu, \sigma^2$ )



**eTable 9.** Matrix of Bayesian NMA results for all follow-up assessment timepoints

| Proportion of patients achieving ≥50% pain reduction in back (OR, 95%CrI)<br>3 months assessment timepoint |                    |                       |
|------------------------------------------------------------------------------------------------------------|--------------------|-----------------------|
| <b>Conventional SCS</b>                                                                                    | 0.21 (0.13, 0.33)  | 10.03 (3.60, 31.43)   |
| 4.68 (3.03, 7.46)                                                                                          | <b>Novel SCS</b>   | 47.05 (15.58, 160.09) |
| 0.10 (0.03, 0.28)                                                                                          | 0.02 (0.01, 0.06)  | <b>CMM</b>            |
| <b>Model</b>                                                                                               | Fixed effects      |                       |
| <b>DIC</b>                                                                                                 | 14.53              |                       |
| Proportion of patients achieving ≥50% pain reduction in back (OR, 95%CrI)<br>6 months assessment timepoint |                    |                       |
| <b>Conventional SCS</b>                                                                                    | 0.34 (0.21, 0.55)  | 3.00 (1.49, 6.72)     |
| 2.92 (1.83, 4.71)                                                                                          | <b>Novel SCS</b>   | 8.76 (3.84, 22.31)    |
| 0.33 (0.15, 0.67)                                                                                          | 0.11 (0.04, 0.26)  | <b>CMM</b>            |
| <b>Model</b>                                                                                               | Fixed effects      |                       |
| <b>DIC</b>                                                                                                 | 14.07              |                       |
| Proportion of patients achieving ≥50% pain reduction in leg (OR, 95%CrI)<br>3 months assessment timepoint  |                    |                       |
| <b>Conventional SCS</b>                                                                                    | 0.40 (0.26, 0.60)  | 26.97 (13.05, 59.88)  |
| 2.53 (1.65, 3.89)                                                                                          | <b>Novel SCS</b>   | 68.43 (33.92, 149.88) |
| 0.04 (0.02, 0.08)                                                                                          | 0.01 (0.01, 0.03)  | <b>CMM</b>            |
| <b>Model</b>                                                                                               | Fixed effects      |                       |
| <b>DIC</b>                                                                                                 | 24.41              |                       |
| Proportion of patients achieving ≥50% pain reduction in leg (OR, 95%CrI)<br>6 months assessment timepoint  |                    |                       |
| <b>Conventional SCS</b>                                                                                    | 0.67 (0.05, 12.99) | 6.93 (0.67, 49.35)    |
| 1.50 (0.08, 21.49)                                                                                         | <b>Novel SCS</b>   | 10.13 (0.45, 129.31)  |
| 0.14 (0.02, 1.50)                                                                                          | 0.10 (0.01, 2.24)  | <b>CMM</b>            |
| <b>Model</b>                                                                                               | Random effects     |                       |
| <b>DIC</b>                                                                                                 | 26.15              |                       |
| Proportion of patients achieving ≥50% pain reduction in leg (OR, 95%CrI)<br>12 months assessment timepoint |                    |                       |
| <b>Conventional SCS</b>                                                                                    | 0.40 (0.25, 0.61)  | 5.32 (1.83, 18.53)    |
| 2.52 (1.64, 3.96)                                                                                          | <b>Novel SCS</b>   | 13.45 (4.24, 50.43)   |
| 0.19 (0.05, 0.55)                                                                                          | 0.07 (0.02, 0.24)  | <b>CMM</b>            |
| <b>Model</b>                                                                                               | Fixed effects      |                       |
| <b>DIC</b>                                                                                                 | 15.61              |                       |
| Proportion of patients achieving ≥50% pain reduction in leg (OR, 95%CrI)<br>24 months assessment timepoint |                    |                       |
| <b>Conventional SCS</b>                                                                                    | 0.35 (0.20, 0.60)  | 2.32 (0.93, 6.05)     |
| 2.82 (1.65, 4.90)                                                                                          | <b>Novel SCS</b>   | 6.58 (2.28, 19.54)    |
| 0.43 (0.17, 1.08)                                                                                          | 0.15 (0.05, 0.44)  | <b>CMM</b>            |
| <b>Model</b>                                                                                               | Fixed effects      |                       |
| <b>DIC</b>                                                                                                 | 10.02              |                       |
| Pain intensity in back (MD, 95%CrI)<br>3 months assessment timepoint                                       |                    |                       |
| <b>Conventional SCS</b>                                                                                    | 1.07 (-0.15, 2.14) | -0.99 (-3.77, 1.81)   |
| -1.07 (-2.14, 0.15)                                                                                        | <b>Novel SCS</b>   | -2.05 (-4.96, 1.06)   |
| 0.99 (-1.81, 3.77)                                                                                         | 2.05 (-1.06, 4.96) | <b>CMM</b>            |
| <b>Model</b>                                                                                               | Random effects     |                       |

|                                                                                   |                       |                        |
|-----------------------------------------------------------------------------------|-----------------------|------------------------|
| DIC                                                                               | 27.97                 |                        |
| <b>Pain intensity in back (MD, 95%CrI)<br/>6 months assessment timepoint</b>      |                       |                        |
| <b>Conventional SCS</b>                                                           | 1.17 ( 0.77, 1.58)    | -1.17 (-1.64, -0.70)   |
| -1.17 (-1.58,-0.77)                                                               | <b>Novel SCS</b>      | -2.34 (-2.96, -1.73)   |
| 1.17 ( 0.70, 1.64)                                                                | 2.34 ( 1.73, 2.96)    | <b>CMM</b>             |
| <b>Model</b>                                                                      | Fixed effects         |                        |
| DIC                                                                               | 23.87                 |                        |
| <b>Pain intensity in leg (MD, 95%CrI)<br/>3 months assessment timepoint</b>       |                       |                        |
| <b>Conventional SCS</b>                                                           | 0.47 (-0.18, 1.18)    | -3.78 (-4.92,-2.68)    |
| -0.47 (-1.18, 0.18)                                                               | <b>Novel SCS</b>      | -4.25 (-5.51,-3.09)    |
| 3.78 ( 2.68, 4.92)                                                                | 4.25 ( 3.09, 5.51)    | <b>CMM</b>             |
| <b>Model</b>                                                                      | Random effects        |                        |
| DIC                                                                               | 36.46                 |                        |
| <b>Pain intensity in leg (MD, 95%CrI)<br/>6 months assessment timepoint</b>       |                       |                        |
| <b>Conventional SCS</b>                                                           | 1.12 ( 0.03, 2.19)    | -2.89 (-4.03, -1.81)   |
| -1.12 (-2.19,-0.03)                                                               | <b>Novel SCS</b>      | -4.01 (-5.31, -2.75)   |
| 2.89 ( 1.81, 4.03)                                                                | 4.01 ( 2.75, 5.31)    | <b>CMM</b>             |
| <b>Model</b>                                                                      | Random effects        |                        |
| DIC                                                                               | 37.98                 |                        |
| <b>EQ-5D index score (MD, 95%CrI)<br/>3 months assessment timepoint</b>           |                       |                        |
| <b>Conventional SCS</b>                                                           | 0.00 (-0.05, 0.04)    | 0.16 (0.11, 0.22)      |
| 0.00 (-0.04, 0.05)                                                                | <b>Novel SCS</b>      | 0.16 (0.12, 0.20)      |
| -0.16 (-0.22, -0.11)                                                              | -0.16 (-0.20, -0.12)  | <b>CMM</b>             |
| <b>Model</b>                                                                      | Fixed effects         |                        |
| DIC                                                                               | 18.01                 |                        |
| <b>EQ-5D index score (MD, 95%CrI)<br/>6 months assessment timepoint</b>           |                       |                        |
| <b>Conventional SCS</b>                                                           | -0.02 (-0.09, 0.05)   | 0.15 (0.09, 0.21)      |
| 0.02 (-0.05, 0.09)                                                                | <b>Novel SCS</b>      | 0.17 (0.13, 0.21)      |
| -0.15 (-0.21, -0.09)                                                              | -0.17 (-0.21, -0.13)  | <b>CMM</b>             |
| <b>Model</b>                                                                      | Fixed effects         |                        |
| DIC                                                                               | 19.49                 |                        |
| <b>Functional disability (ODI) (MD, 95%CrI)<br/>3 months assessment timepoint</b> |                       |                        |
| <b>Conventional SCS</b>                                                           | -1.75 ( -6.01, 2.61)  | -10.52 (-16.42, -4.75) |
| 1.75 ( -2.61, 6.01)                                                               | <b>Novel SCS</b>      | -8.75 (-15.96, -1.77)  |
| 10.52 (4.75,16.42)                                                                | 8.75 (1.77, 15.96)    | <b>CMM</b>             |
| <b>Model</b>                                                                      | Fixed effects         |                        |
| DIC                                                                               | 7.98                  |                        |
| <b>Functional disability (ODI) (MD, 95%CrI)<br/>6 months assessment timepoint</b> |                       |                        |
| <b>Conventional SCS</b>                                                           | -2.15 (-6.51, 2.24)   | -7.10 (-10.91, -3.36)  |
| 2.15 ( -2.24, 6.51)                                                               | <b>Novel SCS</b>      | -4.98 (-10.78, 0.62)   |
| -2.15 (-6.51, 2.24)                                                               | -7.10 (-10.91, -3.36) | <b>CMM</b>             |
| <b>Model</b>                                                                      | Fixed effects         |                        |

|            |              |
|------------|--------------|
| <b>DIC</b> | <b>11.13</b> |
|------------|--------------|

Abbreviations: CMM: conventional medical management; CrI: credible intervals; DIC: Deviance Information Criterion; EQ-5D: EuroQol 5 Dimensions; MD: median difference; ODI: Oswestry Disability Index; OR: odds ratio; SCS: spinal cord stimulation. Table results to be read horizontally and top-to-bottom. Rows represent the intervention and column the comparator. Categorical measures (proportion achieving  $\geq 50\%$  pain reduction) are summarized with odds ratios while continuous measures (pain intensity, EQ-5D, ODI) are summarized with mean differences. GREEN cells represent favourability of SCS vs. Sham/CMM and achieved statistical superiority. YELLOW cells represent favourability of SCS vs. Sham/CMM but did not achieve statistical superiority.

**eFigure 1.** Overall risk of bias across the identified studies

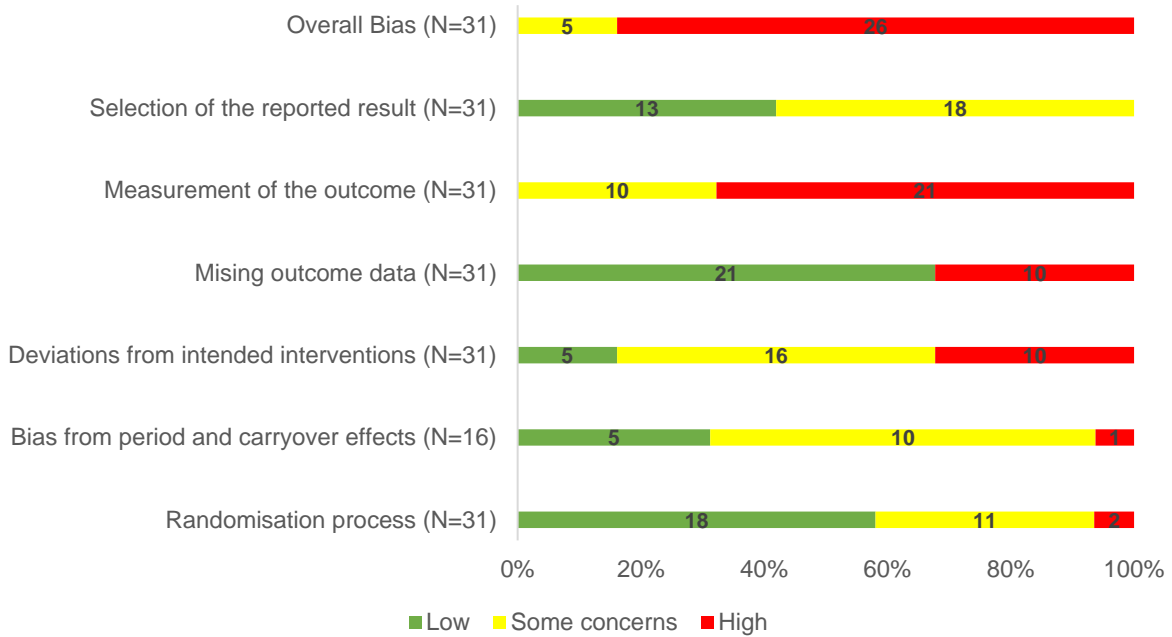

**eFigure 2.** Forest plot for “proportion of patients achieving at least 50% pain reduction in back”, FE model (assessment timepoint: 6 months)

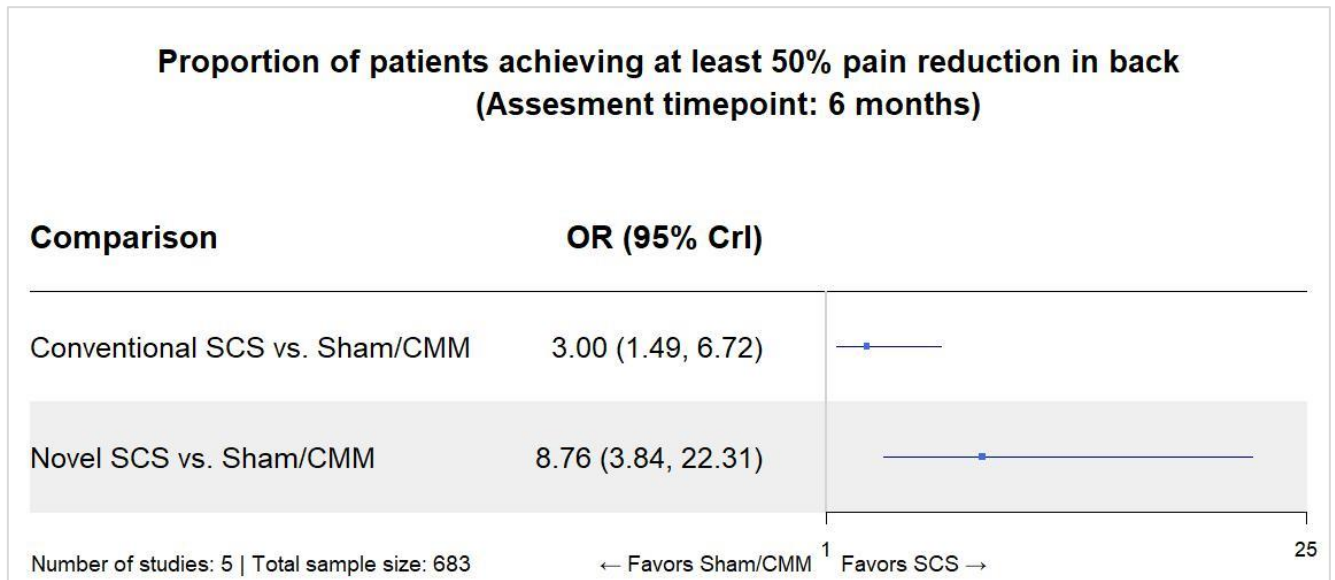

**eFigure 3.** Forest plot for “proportion of patients achieving at least 50% pain reduction in lower limbs/leg”, RE model (assessment timepoint: 6 months)

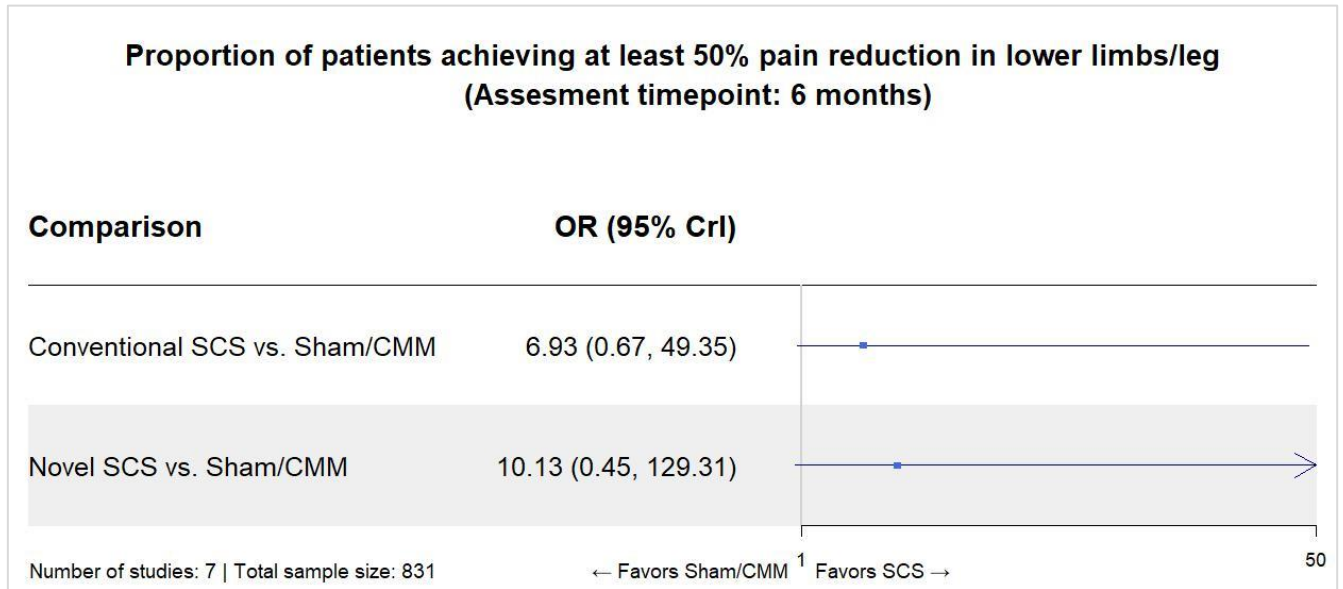

**eFigure 4.** Forest plot for “pain intensity score in back”, FE model (assessment timepoint: 6 months)

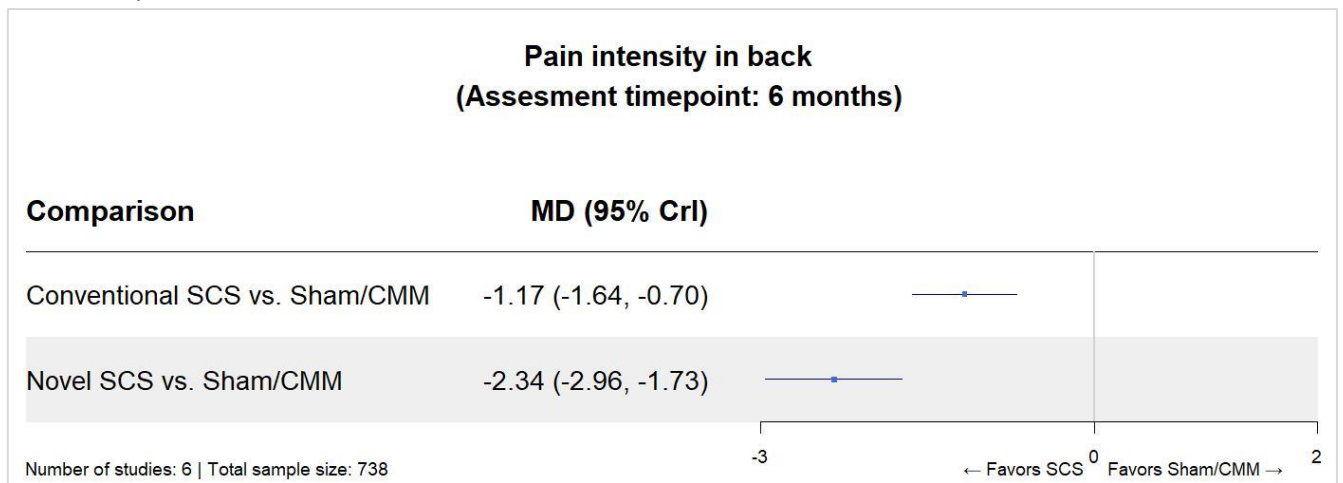

**eFigure 5.** Forest plot for “pain intensity score in lower limbs/leg”, RE model (assessment timepoint: 6 months)

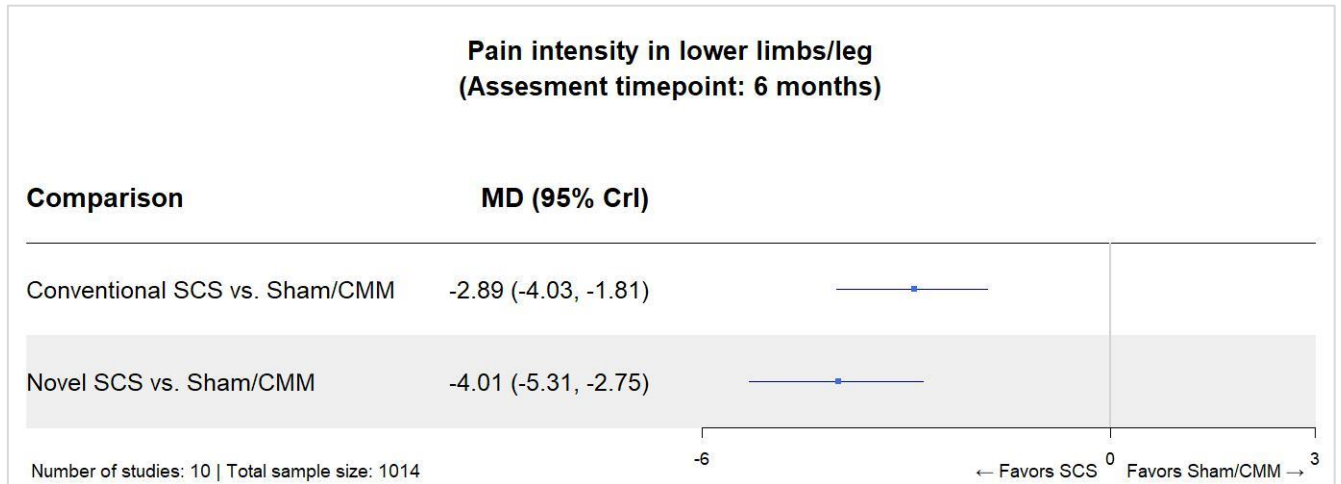

**eFigure 6.** Forest plot for “EQ-5D index score”, FE model (assessment timepoint: 6 months)

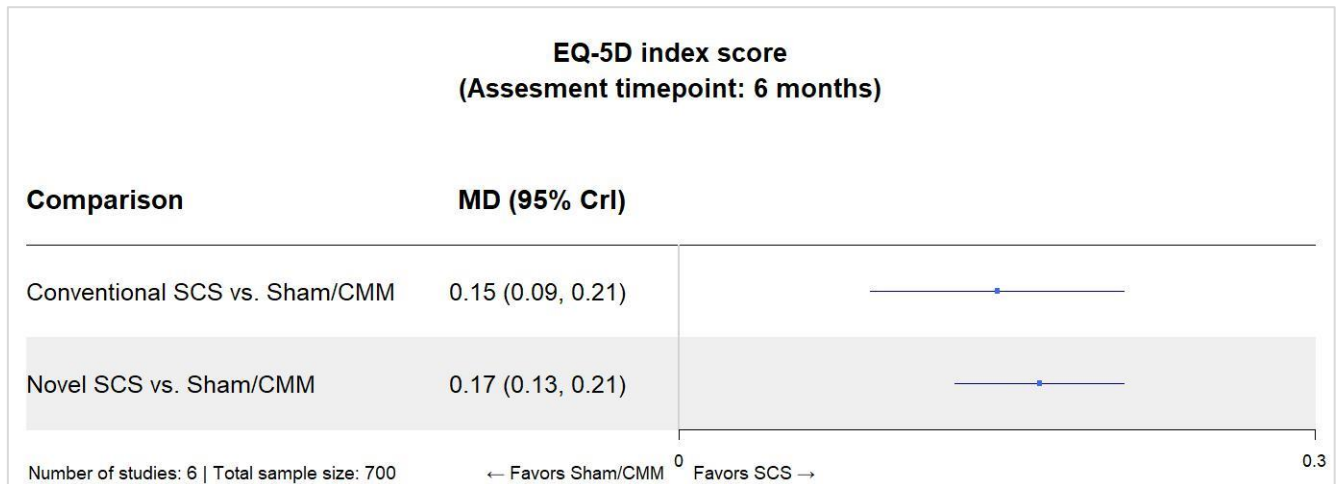

**eFigure 7.** Forest plot for “functional disability: ODI score”, FE model (assessment timepoint: 6 months)

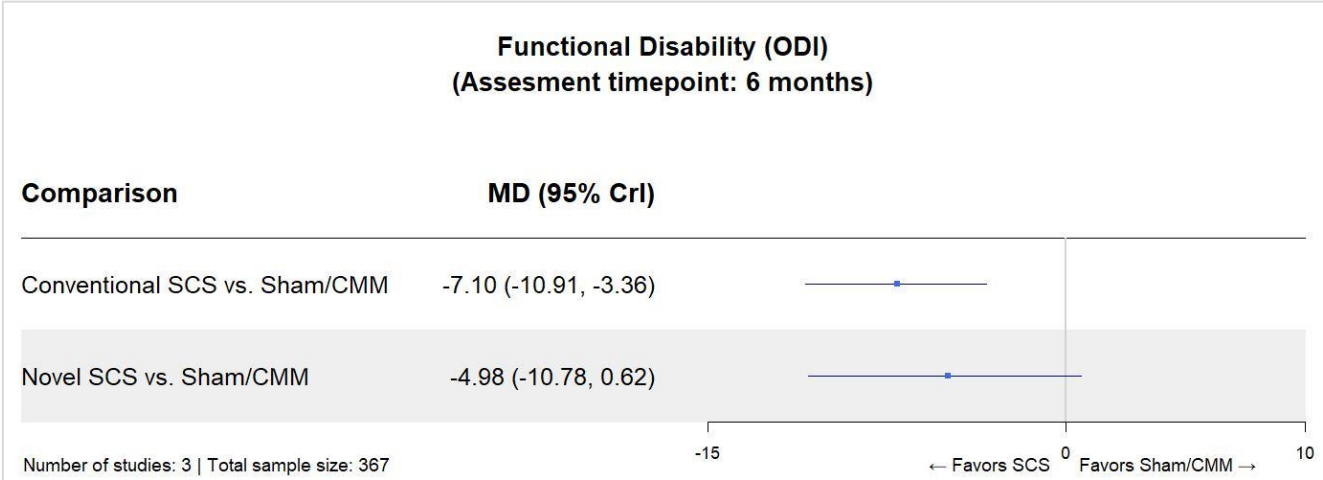

Supplement: jamanetwopen-e2444608-s001.pdf [file jamanetwopen-e2444608-s001.pdf]
