# Supplementary material for: Spinal Cord Stimulation vs Medical Management for Chronic Back and Leg Pain: A Systematic Review and Network Meta-Analysis
Source: PubMed Central journal article supplement — JAMA Netw Open. 2024 Nov 14;7(11):e2444608. doi: 10.1001/jamanetworkopen.2024.44608 (PMC11565267; doi:10.1001/jamanetworkopen.2024.44608), 2024-11-14
Supplement: jamanetwopen-e2444608-s002.pdf [file jamanetwopen-e2444608-s002.pdf]

## **Data Sharing Statement**

### **Data**

**Data available:** No

### **Additional Information**

**Explanation for why data not available:** Only published aggregated data were used and are provided in the supplementary material
